# Supplementary material
Source: publisher figshare collection journal article supplement (https://acs.figshare.com/ndownloader/files/25189395)

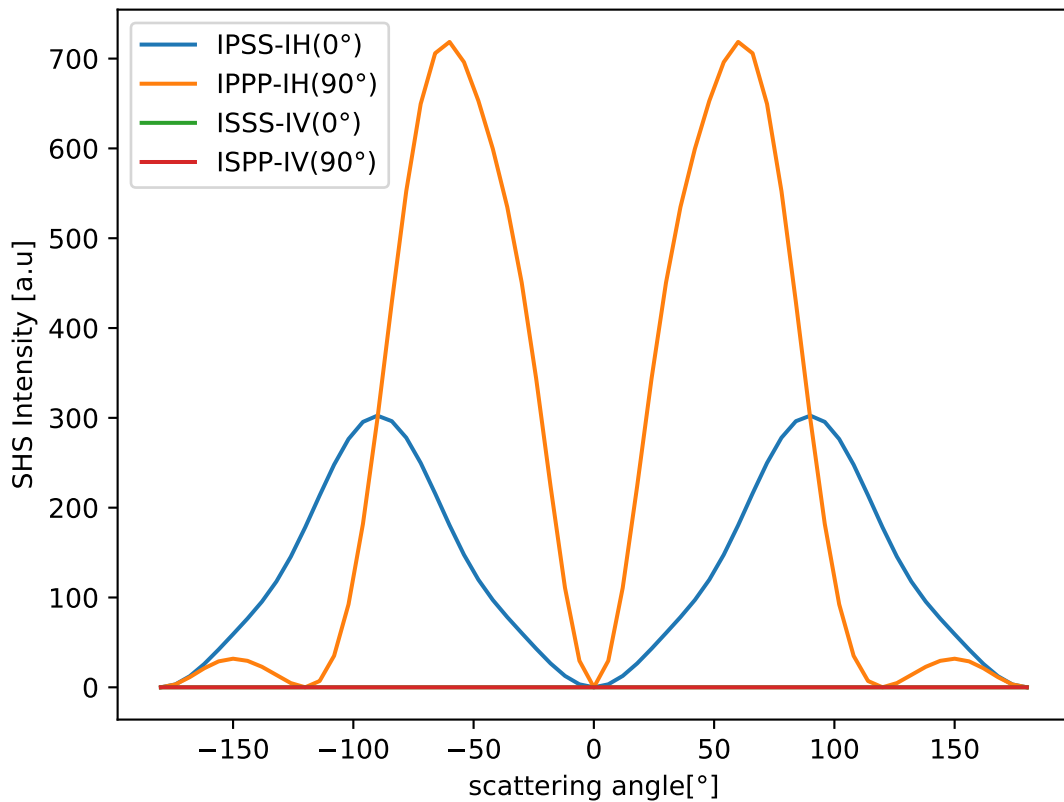

Supplement: Supplementary file 1 [file 25189395]

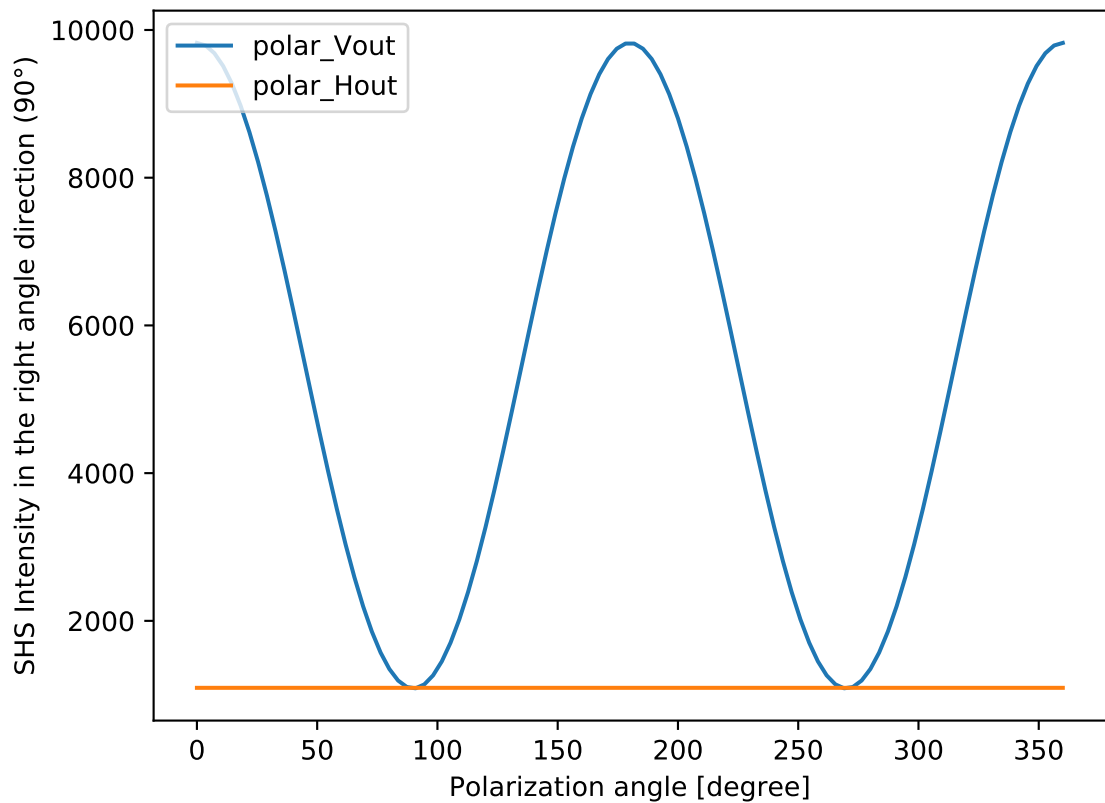

Supplement: Supplementary file 2 [file 25189395]

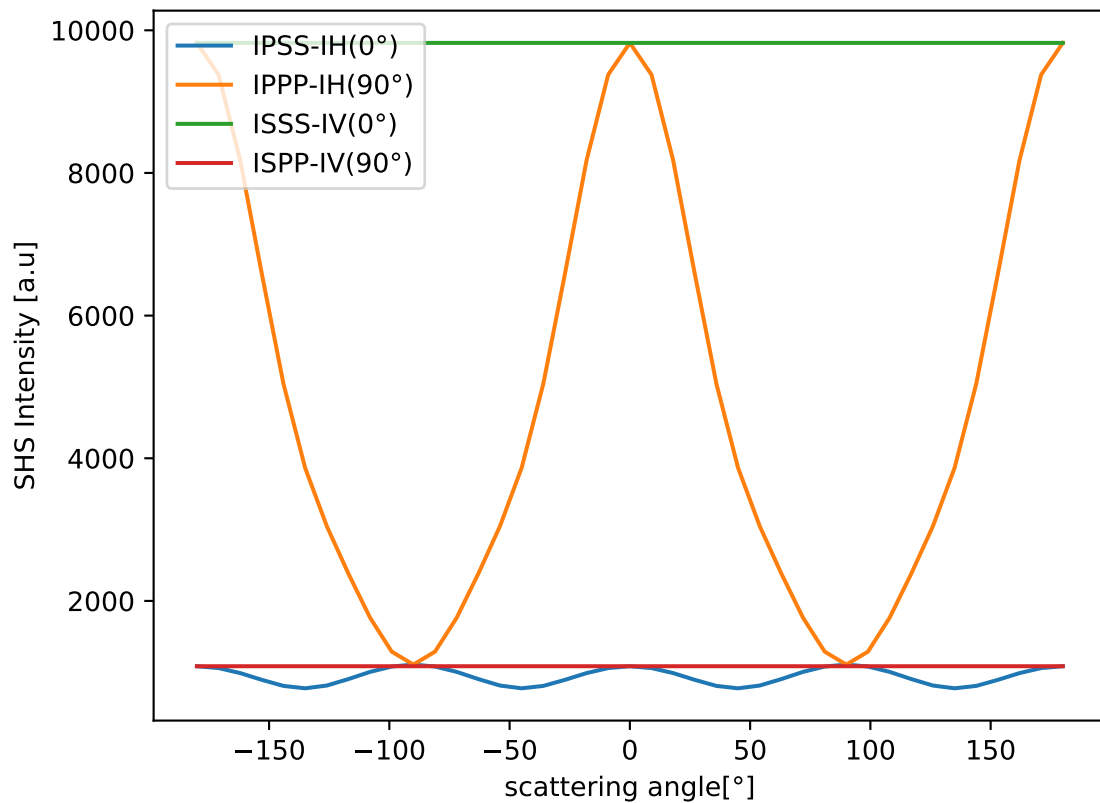

Supplement: Supplementary file 7 [file 25189395]
